# Supplementary material for: Evaluation of PLA-PEG Micellar Nanocarriers with Trastuzumab for Targeted Delivery of Doxorubicin to HER2+ Breast Cancer Cells: A Molecular Dynamics Simulation
Source: Research Square preprint supplement (doi:10.21203/rs.3.rs-7359044/v1), 2025-09-09
Supplement: Supplementary file 1 [file 19bc944202d8d08160ba8580.docx]

**Supplementary Material: “Evaluation of PLA-PEG Micellar Nanocarriers with Trastuzumab for targeted delivery of Doxorubicin to HER2+ Breast Cancer cells: A Molecular Dynamics Simulation”**

Zohreh Arefi Khorrami a*, Mohammad Khedri a, Mostafa Keshavarz Moraveji a, Bahram Nasernejada

aDepartment of Chemical Engineering, Amirkabir University of Technology (Tehran Polytechnic), 424 Hafez Avenue, Tehran 1591634311, Iran

*Corresponding Author: Dr. Zohreh Arefi, Email: [zohreharefi@yahoo.com](mailto:zohreharefi@yahoo.com)

**Keywords:** Drug Delivery, Targeted Drug Delivery, Monoclonal Antibody, Nanoparticle, Molecular Dynamics, Molecular Docking, PLA-PEG, Trastuzumab, Doxorubicin.

**Table of Contents**

***Figure S1.*** *RG**analysis for the Simulation of PLA-PEG Micellar Copolymer in the Water****.***

***Figure S2.*** *RMSD**analysis for the Simulation of PLA-PEG Micellar Copolymer in the Water****.***

***Figure S3.*** *RMSF analysis for the Simulation of PLA-PEG Micellar Copolymer in the Water****.***

***Figure S4.*** *RG analysis for the Simulation of PLA-PEG Micellar Copolymer With Drug****.***

***Figure S5.*** *RMSD analysis for the Simulation of PLA-PEG Micellar Copolymer With Drug****.***

***Figure S6.*** *RMSF analysis for the Simulation of PLA-PEG Micellar Copolymer With Drug****.***

**Figure S1.** RG analysis for the Simulation of PLA-PEG Micellar Copolymer in the Water.

**Figure S2.** RMSD analysis for the Simulation of PLA-PEG Micellar Copolymer in the Water.

**Figure S3.** RMSF analysis for the Simulation of PLA-PEG Micellar Copolymer in the Water.

**Figure S4.** RG analysis for the Simulation of PLA-PEG Micellar Copolymer With Drug.

**Figure S5.** RMSD analysis for the Simulation of PLA-PEG Micellar Copolymer With Drug.

**Figure S6.** RMSF analysis for the Simulation of PLA-PEG Micellar Copolymer With Drug.
